# Supplementary material for: SPSS Analysis of Pain Factors in Rotator Cuff Repair
Source: Hindawi journal article supplement (doi:10.1155/2021/8491846), 2021-09-29
Supplement: f1 [file 8491846.f1.pdf]

## Postoperative Hospitalization

| Affected side                | gender | age          | Date of surgery | Duration of surgery     | Anesthesia method |
|------------------------------|--------|--------------|-----------------|-------------------------|-------------------|
| <b>Total brachial plexus</b> |        |              |                 |                         |                   |
| Right shoulder               | man    | 45 years     | 20210630        | 150 bays                | 36.8 .            |
| Left shoulder                | woman  | 47 years old | 20210518        | 90                      |                   |
| full                         |        | 20           |                 |                         | 37.2 .            |
| <b>Total+brachial plexus</b> |        |              |                 |                         |                   |
| Right shoulder               | woman  | 53 years     | 20210610        | 60 intermuscular        |                   |
| sulcus                       |        | seven        |                 |                         | 36.7 .            |
| <b>Total+brachial plexus</b> |        |              |                 |                         |                   |
| <b>Intermuscular groove,</b> |        |              |                 |                         |                   |
| <b>Axillary road, lock</b>   |        |              |                 |                         |                   |
| Right shoulder               | woman  | 50 years     | 20210616        | 180 on                  |                   |
| bone                         |        | 12           |                 |                         | 36.8 .            |
| Right shoulder               | man    | 64 years old | 20210507        | 140                     |                   |
| full                         |        | 2            |                 |                         | 37.7 .            |
| <b>Total+brachial plexus</b> |        |              |                 |                         |                   |
| Right shoulder               | woman  | 64 years old | 20210512        | 145 Intermuscular       |                   |
| groove                       |        | five         |                 |                         | 37.5 .            |
| <b>Total+brachial plexus</b> |        |              |                 |                         |                   |
| Right shoulder               | man    | 53           | 20210413        | 145 Intermuscular       |                   |
| groove                       |        | 2            |                 |                         | 36.8 .            |
| <b>Total+brachial plexus</b> |        |              |                 |                         |                   |
| Left shoulder                | man    | 43           | 20210413        | 50 Intermuscular groove | 2 37              |
| <b>Total+brachial plexus</b> |        |              |                 |                         |                   |
| Right shoulder               | woman  | 74           | 20210415        | 165 Intermuscular       |                   |
| groove                       |        | 2            |                 |                         | 37.3 .            |
| Right shoulder               | woman  | 71 years old | 20210324        | 140                     |                   |
| full                         |        | 2            |                 |                         | 36.6 .            |
| Left shoulder                | man    | 53 years     | 20210309        | 100                     |                   |
| full                         |        | seven        |                 |                         | 37.5 .            |
| <b>Total+brachial plexus</b> |        |              |                 |                         |                   |

|                               |       |              |          |     |               |
|-------------------------------|-------|--------------|----------|-----|---------------|
| Right shoulderwoman<br>groove | eight | 70<br>37.3 . | 20210226 | 165 | Intermuscular |
|-------------------------------|-------|--------------|----------|-----|---------------|

**Total+brachial plexus**

|                             |   |              |          |     |               |
|-----------------------------|---|--------------|----------|-----|---------------|
| Right shoulderman<br>groove | 2 | 62<br>36.8 . | 20210205 | 145 | Intermuscular |
|-----------------------------|---|--------------|----------|-----|---------------|

128.8461538

Retardation 9 seven

**Postoperative Hospitalization**

|                      |                    |            |                        |                            |                          |
|----------------------|--------------------|------------|------------------------|----------------------------|--------------------------|
| <b>Affected side</b> | <b>gender</b>      | <b>age</b> | <b>Date of surgery</b> | <b>Duration of surgery</b> | <b>Anesthesia method</b> |
| <b>days</b>          | <b>temperature</b> |            |                        |                            |                          |

Total brachial plexus

|                     |          |  |          |         |        |
|---------------------|----------|--|----------|---------|--------|
| Right shoulderwoman | 53 years |  | 20210630 | 90 bays | 36.7 . |
|---------------------|----------|--|----------|---------|--------|

|                     |              |  |          |         |        |
|---------------------|--------------|--|----------|---------|--------|
| Right shoulderwoman | 68 years old |  | 20210630 | 90 full | 36.3 . |
|---------------------|--------------|--|----------|---------|--------|

Total+brachial plexus

|                   |              |  |          |                          |        |
|-------------------|--------------|--|----------|--------------------------|--------|
| Left shoulder man | 47 years old |  | 20210625 | 140 intermuscular sulcus | 36.9 . |
|-------------------|--------------|--|----------|--------------------------|--------|

|                     |              |        |          |     |  |
|---------------------|--------------|--------|----------|-----|--|
| Right shoulderwoman | 76 years old |        | 20210526 | 120 |  |
| full                | six          | 36.7 . |          |     |  |

Total+brachial plexus

|                   |          |        |          |                  |  |
|-------------------|----------|--------|----------|------------------|--|
| Right shoulderman | 51 years |        | 20210603 | 75 intermuscular |  |
| sulcus            | one      | 36.9 . |          |                  |  |

|                   |          |        |          |     |  |
|-------------------|----------|--------|----------|-----|--|
| Left shoulder man | 53 years |        | 20210601 | 120 |  |
| full              | six      | 36.6 . |          |     |  |

Total+brachial plexus

|                    |              |        |          |                   |  |
|--------------------|--------------|--------|----------|-------------------|--|
| Left shoulderwoman | 43 years old |        | 20210608 | 120 intermuscular |  |
| sulcus             | one          | 36.5 . |          |                   |  |

Total+brachial plexus

|                    |              |        |          |                  |  |
|--------------------|--------------|--------|----------|------------------|--|
| Left shoulderwoman | 65 years old |        | 20210611 | 60 intermuscular |  |
| sulcus             | five         | 36.8 . |          |                  |  |

Total brachial plexus lock

|                    |              |        |          |       |  |
|--------------------|--------------|--------|----------|-------|--|
| Left shoulderwoman | 67 years old |        | 20210618 | 40 on |  |
| bone               | three        | 37.3 . |          |       |  |

Total+brachial plexus

|                     |              |        |          |                   |  |
|---------------------|--------------|--------|----------|-------------------|--|
| Right shoulderwoman | 37 years old |        | 20210618 | 110 intermuscular |  |
| groove              | four         | 36.5 . |          |                   |  |

|                                |                              |          |                            |
|--------------------------------|------------------------------|----------|----------------------------|
| Right shoulder<br>full one     | woman 70 years old<br>36.9 . | 20210511 | 80                         |
| Total+brachial plexus          |                              |          |                            |
| Left shoulder<br>groove one    | woman 55 years<br>36.7 .     | 20210507 | 100Intermuscular           |
| Total+brachial plexus          |                              |          |                            |
| Right shoulder<br>man          | 51 years                     | 20210512 | 95Intermuscular grooveone  |
| Total+brachial plexus          |                              |          |                            |
| Right shoulder<br>groove three | woman 66<br>37.4 .           | 20210510 | 230Intermuscular           |
| Right shoulder<br>from three   | woman sixty-nine<br>37.5 .   | 20210512 | 150 arm                    |
| Total+brachial plexus          |                              |          |                            |
| Right shoulder<br>groove five  | man 64<br>36.5 .             | 20210512 | 140Intermuscular           |
| Total+brachial plexus          |                              |          |                            |
| Right shoulder<br>groove 2     | woman 56 years<br>37.3 .     | 20210524 | 155Intermuscular           |
| Total+brachial plexus          |                              |          |                            |
| Right shoulder<br>groove 2     | woman 65 years old<br>36.8 . | 20210526 | 120Intermuscular           |
| Total+brachial plexus          |                              |          |                            |
| Left shoulder<br>groove one    | woman 68 years old<br>36.7 . | 20210528 | 60Intermuscular            |
| Total+brachial plexus          |                              |          |                            |
| Right shoulder<br>man          | woman 67                     | 20210409 | 110Intermuscular grooveone |
| Total+brachial plexus          |                              |          |                            |
| Right shoulder<br>man          | forty-two                    | 20210414 | 145Intermuscular grooveone |
| Total+brachial plexus          |                              |          |                            |
| Left shoulder<br>groove one    | man 43<br>36.9 .             | 20210414 | 115Intermuscular           |
| Total+brachial plexus          |                              |          |                            |

|                                   |              |          |                      |               |
|-----------------------------------|--------------|----------|----------------------|---------------|
| Left shoulder woman<br>groove one | 51<br>36.8 . | 20210414 | 120                  | Intermuscular |
| Total+brachial plexus             |              |          |                      |               |
| Right shoulder man<br>groove one  | 61<br>36.5 . | 20210415 | 220                  | Intermuscular |
| Total+brachial plexus             |              |          |                      |               |
| Intermuscular groove,             |              |          |                      |               |
| 120                               |              |          | 37.3 .               |               |
| Axillary road, lock               |              |          |                      |               |
| Left shoulder man                 | forty-nine   | 20210416 | On bone              | three         |
| Total+brachial plexus             |              |          |                      |               |
| 150                               |              |          | 37.5 .               |               |
| Right shoulder woman              | 58 years old | 20210328 | Intermuscular groove | 2             |
| Total+brachial plexus             |              |          |                      |               |
| 145                               |              |          | 37                   |               |
| Left shoulder woman               | 65 years old | 20210324 | Intermuscular groove | one           |
| Right shoulder woman              | 48 years     | 20210324 | 120 full             |               |
| Right shoulder woman              | 56 years     | 20210323 | 75 cervical          |               |
| plexus                            | 2 36.9 .     |          |                      |               |
| Left shoulder man                 | 60 years old | 20210322 | 130                  | 2 37          |
| Total+brachial plexus             |              |          |                      |               |
| 195                               |              |          | 36.7 .               |               |
| Right shoulder man                | 56 years     | 20210315 | Intermuscular groove | five          |
| 80 full                           |              |          | 36.7 .               |               |
| Right shoulder woman              | 33 years old | 20210111 |                      | one           |
| 145 full                          |              |          | 37.4 .               |               |
| Left shoulder woman               | 69 years old | 20210309 |                      | 2             |
| Total+brachial plexus             |              |          |                      |               |
| 170                               |              |          | 36.5 .               |               |
| Right shoulder woman              | 57 years old | 20210309 | Intermuscular groove | one           |
| Total+brachial plexus             |              |          |                      |               |

110 36.8 .  
 Right shoulderwoman69 years old 20210310 Intermuscular groove 2  
 Right shoulderwoman 63 years 20210305 100  
 full three 36.9 .  
 Right shoulderwoman 54 years 20210305 90 full three37  
 Right shoulderwoman73 years old 20210305 126  
 full four 36.7 .

Total+brachial plexus

130 36.9 .  
 Right shoulderwoman59 years old 20210226 Intermuscular groove one

Total+brachial plexus

90 38  
 Left shoulder man 66 20210225 Intermuscular groove seven

Total+brachial plexus

100 36.9 .  
 Right shoulderman forty-four 20210223 Intermuscular groove five  
 Left shoulderwoman 51 20210205 90  
 full five 36.9 .

118.3571429 31 11

**Type and quantity of preoperative analgesia with postoperative analgesic Opioid ambassadors Single row/double course diabetes Analgesic pump medicine , days Number of uses Number of anchors Platoon (D/S) appease, noyang Strong pain**

July without without Heng yang Tramadol 100 2 S demerol  
 10d without have N console 50mg1 times2 D pentazocine Pentazot  
 10mg3 days, Xin, strong pain  
 1y without have Heng yang Diclofenac im Set once1 S strong pain constant Yang, QuAnFu, Yang 100mg1  
 24d without without Mardo Tramadol time4 D Comfort, pregabalin, NOYAN Pethidine  
 1y have N 、 50mg1 times3 D demerol 2 appease, pury Times, strong pain  
 6m without have Heng yang Bahrain, Mina 1 time of 1 S prednisone  
 100mg1

2y without without Heng yang Appease, noyang time3 D Severe Pain Relief, Prius 100mg2

2m without without N Bahrain time 2 D

1Y2M have without Heng Yang, QuMa calm, pregabalin 50m 2 D

10y without have Heng yang Appease, noyang Demerol 50m 4 D Qiantongding 100mg1

2M without have Appease, constant Yang time 3 D

6m without without Appease, pregabalin pain 100mg1 times

2M have without N Appease, pregabalin 100 3 D

**2 6 7y2.5 9 type and quantity of preoperative analgesia with postoperative analgesic Opioid ambassadors Single row/double course diabetes Analgesic pump medicine , days Number of uses Number of anchors Row (D/S) pregabalin+**

7m without without N Noam 0 1 D pregabalin+norion+dichloro

2m10d without have N Sodium phenolate N 2 D calm, Yang , tramadol,

2 years without have Heng yang Mina N 4 D

Appease, pregabalin, noyang

6m without have Heng yang , diclofenac acid N 3 D Comfort, pregabalin, NOYAN , diclofenac acid

3m without without Heng yang accept N 1 calm, Yang

3Y without without N , mina, N 1 S

5m without without N console N 1 S

5y without without Heng yang console N 1 S

5y without without N console N 2 S

7m without have Heng yang Appease, noyangN 2 D

4 years without without Heng yang console N 1 S comfort, pury

6m without N Bahrain, noyang N 1 S Comfort, pregabalin, NOYAN

3m without without N 3,Hengyang N 1 S comfort, constant

3m without have raise Appease, noyangN 2 D

3m without without Heng yang Appease, noyang n 2 S comfort, pury

|                |                |               |                                 |     |                             |                          |
|----------------|----------------|---------------|---------------------------------|-----|-----------------------------|--------------------------|
| 1y             | have           | without       | Heng yang Bahrain, noyangN      |     |                             | 2 D                      |
| 3Y             | without        | have          | Heng yang Appease, noyang n     | 2 D | comfort, double chlorine    |                          |
| 4M             | without        | have          | N Sodium phenolate              | N   | 2 D                         | comfort, double chlorine |
| 2m             | without        | without       | Heng yangSodium phenolate       |     |                             | N 2 D                    |
| 3m             | without        | without       | N Appease, noyang n             | 1 S | heng yang, pury             |                          |
| 2Y             | without        | without       | N Bahrain, noyang N             | 2 D | Hengyang, pregabalin, NOYAN |                          |
| 5Y             | without        | have          | N Tramadol                      | N   | 1 S                         | heng yang, pury          |
| 1M             | without        | have          | Heng yang Bahrain N             | 1 D | comfort, pury               |                          |
| 7M             | without        | without       | N Bahrain, noyangN              |     |                             | 2 D                      |
| 4M             | Heng yang      | Appease, prib | 1 S                             | yes | without                     | N                        |
| 3m             | without        | N             | Appease, noyang                 | 3 D | none                        | N                        |
| 4M             | without        | Heng yang     | Appease, noyang                 | 0   | none                        | N none without 0         |
| 10Y            | without        | without       | Heng yang Appease, noyang n     |     |                             | 0                        |
| 1Y             | have           | without       | Heng yang console               |     | N                           | 1 S                      |
| 1m             | without        |               | Heng yangAppease, constant Yang |     |                             | 0                        |
| <b>without</b> |                | <b>N</b>      |                                 |     |                             |                          |
| 4M             |                |               | Heng yang Appease, prib         |     |                             | 1 S                      |
| <b>have</b>    | <b>without</b> | <b>N</b>      |                                 |     |                             |                          |
| 2M             | without        |               | Heng yang Appease, prib         |     |                             | 2 D                      |
| <b>without</b> |                | <b>N</b>      |                                 |     |                             |                          |
| 3m             |                |               | N Appease, noyang               |     |                             | 2 D                      |
| <b>have</b>    | <b>without</b> | <b>N</b>      |                                 |     |                             |                          |
| 1Y             | without        |               | Heng yang Appease, prib         |     |                             | 4 D                      |
| <b>without</b> |                | <b>N</b>      |                                 |     |                             |                          |
| 7Y             | without        | without       | Heng yang console               |     | N                           | 5 D                      |
| 1Y             | without        | without       | Heng yang console               |     | N                           | 2 D                      |
| 3D             | without        | without       | N console                       |     | N                           | 2 D                      |
| 1m             | without        |               | N console                       |     |                             | 2 D                      |
| <b>without</b> |                | <b>N</b>      |                                 |     |                             |                          |
| 1y             | without        |               | N Appease, constant Yang        |     |                             | 1 S                      |

|         |         |         |    |                        |  |     |
|---------|---------|---------|----|------------------------|--|-----|
| without |         | N       |    |                        |  |     |
| 2y      | without |         | N  | Appease, constant Yang |  | 2 D |
| have    |         | N       |    |                        |  |     |
| 5D      | without | without | N  | Appease, noyang n      |  | 0   |
| five    |         | 10      | 22 | 1.619047619            |  | 21  |

48h after surgery  
Maximum pain

Combined cartilage

Whether the formed tear size of the shoulder peak of the biceps tendon retracts or not? Pre-operation for the injury site of tear shape value

Lower scapular region

Y N N Y minute four eight

Supragang muscle insufficiency

N N Y 1 N new moon floor three eight

Upper surface

N N Y 0.5 N new moon part three six

Supragang muscle insufficiency

N N Y 2 Y new moon floor three seven

On duty

N Y y 0.5 Y L Full layer three seven

Supragang muscle insufficiency

N N Y 1.5 N new moon floor three eight

Supragang muscle insufficiency

N Y Y 2.5 Y L floor 2 eight

Lower scapular region

Points+on duty

N Y N 2 Y L Full layer 2 eight

Supragang muscle insufficiency

N Y Y 0.5 Y new moon floor three eight

Supragang muscle insufficiency

N Y Y 2 N L floor four seven

Supragang muscle insufficiency



N Y Y 2 N new moon floor 2 eight  
 three eight

N Y N 1.5 N new moon Supraspinatus whole  
 layer three eight  
 one seven nine

EU small 48h after surgery

**Combined cartilage Parting/tearing Maximum pain**

**harm Biceps tendon acromion forming tear size whether retraction crack shape Preoperative injury site value**

Supragang muscle insufficiency

N N Y 1CM N L floor three three

Supragang muscle insufficiency

N N Y 1CM N new moon floor 2 three

Supragang muscle table

N N Y 2CM Y L face one four

N N Y 1.5 N new moon  
 Subscapular part+suprascapular part  
 Full layer 2 three  
 Upper surface

N N Y 0.5 N new moon part  
 Supragang muscle table

N Cut fixed y 0.5 N new moon face three 3  
 supragang muscle table

N Cut fixed n 0.5 N face three 1 lower scapular region

N Y I N minute three 4 supragang muscle insufficiency

Y cut off Y 1.5 Y U Level, post four Supragang muscle insufficiency

N Y Y 1.5 Y L floor three 4 supragang muscle table

|   |                  |   |          |     |   |                   |               |      |           |               |        |               |  |
|---|------------------|---|----------|-----|---|-------------------|---------------|------|-----------|---------------|--------|---------------|--|
| N |                  |   |          |     |   | N                 | Y             | 1    | Y         | new moon      | face   |               |  |
|   |                  |   |          |     |   | 2                 |               |      |           | Supragang     | muscle |               |  |
|   |                  |   |          |     |   |                   |               |      |           | insufficiency |        |               |  |
| N | N                | N |          | 0.5 | N | new moon          | floor         |      |           |               | three  | three         |  |
|   |                  |   |          |     |   |                   |               |      |           | Supragang     | muscle | table         |  |
| N |                  |   |          |     |   | N                 | N             | 0.5  | N         | new moon      |        |               |  |
|   |                  |   |          |     |   | face              | three         |      | 2         | Superior      |        |               |  |
|   |                  |   |          |     |   |                   |               |      |           | Ganglia       | muscle | insufficiency |  |
| N |                  |   |          |     |   | Y                 | Y             | 1.5  | Y         | L             | floor  |               |  |
|   |                  |   |          |     |   | three             |               |      |           | Supragang     | muscle |               |  |
|   |                  |   |          |     |   | insufficiency     |               |      |           |               |        |               |  |
| N |                  |   |          |     |   | Y                 | Y             | 1.5  | Y         | floor         | 2      |               |  |
|   |                  |   |          |     |   | 2                 | Superior      | gang | muscle    | table         |        |               |  |
| N |                  |   |          |     |   | N                 | N             | 1.5  | Y         | new moon      |        |               |  |
|   |                  |   |          |     |   | face              | three         |      |           | Supragang     |        |               |  |
|   |                  |   |          |     |   | muscle            | insufficiency |      |           |               |        |               |  |
| N |                  |   |          |     |   | cut off           | N             | 1.5  | N         | U             |        |               |  |
|   |                  |   |          |     |   | floor             | 2             | 1    | supragang |               |        |               |  |
|   |                  |   |          |     |   | muscle            | table         |      |           |               |        |               |  |
| N |                  |   |          |     |   | N                 | Y             | 1    | N         | L             | face   | 2             |  |
|   |                  |   |          |     |   |                   |               |      |           | Supragang     | muscle | insufficiency |  |
| N |                  |   |          |     |   | N                 | N             | 1.5  | N         | L             | floor  |               |  |
|   |                  |   |          |     |   | three             |               | 3    | supragang | muscle        |        |               |  |
|   |                  |   |          |     |   | table             |               |      |           |               |        |               |  |
| N |                  |   |          |     |   | N                 | N             | 1    | N         | new moon      | face   |               |  |
|   |                  |   |          |     |   | three             |               |      |           | Supragang     | muscle |               |  |
|   |                  |   |          |     |   | insufficiency     |               |      |           |               |        |               |  |
| N | N                | Y |          | 2   | N | new moon          | floor         |      |           |               | one    | three         |  |
|   |                  |   |          |     |   |                   |               |      |           | Supragang     | muscle | table         |  |
| N |                  |   |          |     |   | N                 | Y             | 1    | N         | new moon      | face   |               |  |
|   |                  |   |          |     |   | three             |               | 3    | supragang | muscle        |        |               |  |
|   |                  |   |          |     |   | table             |               |      |           |               |        |               |  |
| N |                  |   |          |     |   | N                 | Y             | 1    | N         | new moon      | face   |               |  |
|   |                  |   |          |     |   | three             |               |      |           | Supragang     | muscle |               |  |
|   |                  |   |          |     |   | insufficiency     |               |      |           |               |        |               |  |
| N | Y                | Y |          | 2   | Y | L                 | floor         |      |           | 2             |        | three         |  |
|   |                  |   |          |     |   |                   |               |      |           |               |        |               |  |
| N | N                |   |          | 0.5 | N |                   |               |      |           |               | three  | three         |  |
|   |                  |   |          |     |   |                   |               |      |           | Supragang     | muscle | insufficiency |  |
| Y |                  |   | new moon |     |   | floor             |               |      |           |               |        |               |  |
| N | Cut, sew and fix |   |          | Y   |   | On duty, off duty |               |      |           |               | three  | three         |  |

Supragang muscle table

|   |                                |      |                 |                    |       |       |
|---|--------------------------------|------|-----------------|--------------------|-------|-------|
| N | Y                              |      | 1.5 N           |                    | four  | three |
| Y |                                | face |                 |                    |       |       |
| Y | On-duty surface short-tempered |      |                 |                    |       |       |
| N | N                              | Y    | 1 Microfracture | Upper surface hair | three | one   |
| N | cut off                        | Y    | N               | Subscapularis part | four  | 2 N Y |
|   |                                | Y    |                 | Upper surface hair | 2     | three |

Supragang muscle table

|   |  |   |       |       |     |          |      |
|---|--|---|-------|-------|-----|----------|------|
| N |  | Y | 0.5 N | three | 0 N | new moon | face |
|---|--|---|-------|-------|-----|----------|------|

Supragang muscle table

|   |   |      |       |   |                           |       |
|---|---|------|-------|---|---------------------------|-------|
| N | N |      | 1 N   | L | four                      | three |
| Y |   | face |       |   |                           |       |
| N | Y |      | 0.5 Y | L | Supraspinatus whole layer | four  |
|   |   | Y    |       |   |                           | three |

|      |       |  |       |            |                       |
|------|-------|--|-------|------------|-----------------------|
| N    | N     |  | 2.5 N | Fish mouth | Supraspinatus surface |
| part | three |  | three |            |                       |

|      |      |       |       |          |                       |
|------|------|-------|-------|----------|-----------------------|
| N    | Y    | Y     | 0.5 N | new moon | Supraspinatus surface |
| hair | five | three |       |          |                       |

|   |   |   |     |   |                            |       |       |
|---|---|---|-----|---|----------------------------|-------|-------|
| N | N | Y | 1 Y | L | Supraspinatus surface part | three | three |
|---|---|---|-----|---|----------------------------|-------|-------|

|   |   |   |     |          |                 |       |   |
|---|---|---|-----|----------|-----------------|-------|---|
| N | N | Y | 1 N | new moon | Okada and okada | three | 2 |
|---|---|---|-----|----------|-----------------|-------|---|

|   |   |  |     |   |                            |       |       |
|---|---|--|-----|---|----------------------------|-------|-------|
| N | N |  | 2 Y | L | Supraspinatus surface part | three | three |
|---|---|--|-----|---|----------------------------|-------|-------|

N

|      |         |  |       |          |                       |
|------|---------|--|-------|----------|-----------------------|
| N    | cut off |  | 0.5 N | new moon | Supraspinatus surface |
| part | 2       |  | three |          |                       |

Y

|       |   |  |       |          |                     |
|-------|---|--|-------|----------|---------------------|
| N     | N |  | 1 N   | new moon | Supraspinatus whole |
| layer | 2 |  | three |          |                     |

Y

|     |    |    |  |                     |       |       |
|-----|----|----|--|---------------------|-------|-------|
| N   | N  | N  |  | Supraspinatus mania | three | three |
| one | 14 | 31 |  |                     |       |       |

## Osteoporosis Operatorcervical spondylopathy

without

without week N

without summer Y

without once N

withoutmerchant N

without what N

without summer N

without summer N

what N none

summer N

without Y

withoutmerchant N

2

## Osteoporosis Operatorcervical spondylopathy

N

N

N

N summer

merchant

N Y

N week N N

summer Y

N summer Y

N summer N

N summer N

N merchant N

merchant N

N xia n

N summer N

N summer N

Y once N

N summer N

N merchant N

N what N

N what N

N merchant N

N once N

Y what N

merchant N

N

summer N

N

merchant N

N

N summer N

N summer N

N great N

N merchant N

N merchant Y

Y what N

N summer N

N what Y

N summer N

N what N

N what N

N week N

N week N

N merchant N

N merchant N

five
